# Supplementary material
Source: HighWire-hosted journal article supplement (https://jech.bmj.com/content/jech-2023-220746)
Supplement: inline-supplementary-material-1 [file inline-supplementary-material-1.pdf]

## SUPPLEMENTARY MATERIAL

**Table S1. Years of the intervention (smoking ban laws) by country included in the study and years of intervention used in the main analysis for each indicator.**

**Table S2. Characteristics of countries and smoking bans considered in the meta-regression analysis.**

**Table S3. Results of the interrupted time series analysis regarding cigarette consumption for countries with data availability for less than three years before and after each smoking ban law (results representing significant reductions are reported in bold).**

**Table S4. Results of the interrupted time series analysis regarding AMI mortality for countries with data availability for less than three years before and after each smoking ban law (results representing significant reductions are reported in bold).**

**Figure S1. Trends of per-capita cigarette consumption for all countries included in the analysis.**

**Figure S2. Trends of mortality due to acute myocardial infarction (AMI) for all countries included in the analysis.**

**Table S1. Years of the intervention (smoking ban laws) by country included in the study and years of intervention used in the main analysis for each indicator.**

| Country         | Year of entry into force     | Year of intervention, per-capita cigarette consumption | Year of intervention, AMI mortality |
|-----------------|------------------------------|--------------------------------------------------------|-------------------------------------|
| Austria         | 2009                         | 2009                                                   | 2009                                |
| Belgium         | 2006, 2007, 2008, 2010, 2011 | 2006, 2011                                             | 2006, 2011                          |
| Bulgaria        | 2005, 2012                   | NA                                                     | 2005, 2012                          |
| Croatia         | 2008, 2009, 2010             | 2008                                                   | 2008                                |
| Cyprus          | 2002, 2010                   | NA                                                     | 2010                                |
| Czech Republic  | 2006, 2017                   | 2006                                                   | 2006                                |
| Denmark         | 2007, 2012                   | 2007, 2012                                             | 2007, 2012                          |
| Estonia         | 2005, 2007                   | 2005                                                   | 2005                                |
| Finland         | 1976, 1995, 2007             | NA                                                     | 2007                                |
| France          | 1976, 1991, 2007, 2008       | 1976, 1991, 2007                                       | 2007                                |
| Germany         | 2007, 2008                   | 2007                                                   | NA                                  |
| Greece          | 2003, 2009, 2010             | 2003, 2009                                             | 2003, 2009                          |
| Hungary         | 1999, 2012                   | 1999, 2012                                             | 1999, 2012                          |
| Ireland         | 1988, 2004                   | 1988, 2004                                             | 2004                                |
| Italy           | 1975, 2005                   | 1975, 2005                                             | 2005                                |
| Latvia          | 2005                         | NA                                                     | 2005                                |
| Lithuania       | 1996, 2007                   | 2007                                                   | 2007                                |
| Luxembourg      | 2006, 2014                   | NA                                                     | 2006, 2014                          |
| Malta           | 2004, 2011                   | NA                                                     | 2004, 2011                          |
| The Netherlands | 1990, 2004, 2008, 2014       | 1990, 2004, 2008                                       | NA                                  |
| Poland          | 1995, 2010                   | 1995, 2010                                             | 2010                                |
| Portugal        | 2008                         | 2008                                                   | 2008                                |
| Romania         | 2008, 2016                   | 2008                                                   | 2008                                |
| Slovakia        | 2004, 2009                   | 2004, 2009                                             | 2004, 2009                          |
| Slovenia        | 2007                         | 2007                                                   | 2007                                |
| Spain           | 2006, 2011                   | 2006, 2011                                             | 2006, 2011                          |
| Sweden          | 2005                         | 2005                                                   | 2005                                |
| United Kingdom  | 2006 (Scotland only), 2007   | 2007                                                   | 2007                                |

AMI: acute myocardial infarction, NA: data not available

**Table S2. Characteristics of countries and smoking bans included in the meta-regression analysis.**

| Country         | Year of intervention | Population aged >65 years, % | HDI   | Places where ban applies, type of ban |                        |             |            |                  |
|-----------------|----------------------|------------------------------|-------|---------------------------------------|------------------------|-------------|------------|------------------|
|                 |                      |                              |       | Workplace                             | Enclosed Public Places | Restaurants | Bars       | Public Transport |
| Austria         | 2009                 | 17.51                        | 0.895 | Near-total                            | Near-total             | Partial     | Partial    | Near-total       |
| Bulgaria        | 2005                 | 17.35                        | 0.762 | NA                                    | NA                     | NA          | NA         | NA               |
|                 | 2012                 | 18.81                        | 0.798 | Total                                 | Total                  | Total       | Total      | Near-total       |
| Cyprus          | 2010                 | 11.42                        | NA    | Near-total                            | Total                  | Total       | Total      | Near-total       |
| Czech Republic  | 2006                 | 14.23                        | 0.852 | Partial                               | Partial                | None        | None       | Near-total       |
| Denmark         | 2007                 | 15.66                        | 0.911 | Near-total                            | Near-total             | Near-total  | Partial    | Near-total       |
|                 | 2012                 | 17.49                        | 0.931 | Near-total                            | Near-total             | Near-total  | Partial    | Near-total       |
| Finland         | 2007                 | 16.36                        | 0.857 | Near-total                            | Near-total             | Near-total  | Near-total | Near-total       |
| Hungary         | 1999                 | 15.00                        | 0.765 | Partial                               | Partial                | Partial     | Partial    | Partial          |
|                 | 2012                 | 16.58                        | 0.831 | Total                                 | Total                  | Total       | Total      | Total            |
| Ireland         | 1988                 | 11.04                        | NA    | NA                                    | NA                     | NA          | NA         | NA               |
|                 | 2004                 | 10.49                        | 0.898 | Total                                 | Total                  | Total       | Total      | Total            |
| Italy           | 1975                 | 12.19                        | NA    | NA                                    | NA                     | NA          | NA         | NA               |
|                 | 2005                 | 19.66                        | 0.865 | Near-total                            | Near-total             | Near-total  | Near-total | Near-total       |
| Latvia          | 2005                 | 16.86                        | 0.808 | Near-total                            | Near-total             | Near-total  | Near-total | Near-total       |
| Lithuania       | 2007                 | 16.61                        | 0.833 | Near-total                            | Total                  | Total       | Total      | Total            |
| Luxembourg      | 2006                 | 14.33                        | 0.885 | Near-total                            | Total                  | Near-total  | Partial    | Near-total       |
|                 | 2014                 | 13.96                        | 0.915 | Near-total                            | Total                  | Near-total  | Total      | Total            |
| Malta           | 2004                 | 13.39                        | 0.823 | Total                                 | Total                  | Total       | Total      | Total            |
|                 | 2011                 | 16.22                        | 0.857 | Total                                 | Total                  | Total       | Total      | Total            |
| The Netherlands | 1990                 | 12.73                        | 0.836 | NA                                    | NA                     | NA          | NA         | NA               |
|                 | 2004                 | 14.01                        | 0.892 | NA                                    | NA                     | NA          | NA         | NA               |
|                 | 2008                 | 14.77                        | 0.913 | Near-total                            | Near-total             | Near-total  | Partial    | Near-total       |

|                |      |       |       |            |            |            |            |            |
|----------------|------|-------|-------|------------|------------|------------|------------|------------|
| Poland         | 1995 | 10.95 | 0.745 | NA         | NA         | NA         | NA         | NA         |
|                | 2010 | 13.47 | 0.84  | Near-total | Total      | Near-total | Near-total | Near-total |
| Portugal       | 2008 | 17.98 | 0.817 | Partial    | Partial    | Partial    | Partial    | Total      |
| Romania        | 2008 | 15.53 | 0.803 | Near-total | Near-total | Partial    | Partial    | Total      |
| Slovakia       | 2004 | 11.58 | 0.784 | NA         | NA         | NA         | NA         | NA         |
|                | 2009 | 12.26 | 0.825 | Near-total | Total      | Near-total | None       | Near-total |
| Slovenia       | 2007 | 16.02 | 0.888 | Near-total | Near-total | Near-total | Near-total | Near-total |
| Spain          | 2006 | 16.70 | 0.856 | Total      | Total      | Near-total | Near-total | Near-total |
|                | 2011 | 17.33 | 0.878 | Total      | Total      | Total      | Total      | Total      |
| Sweden         | 2005 | 17.31 | 0.904 | Near-total | Near-total | Near-total | Near-total | Near-total |
| United Kingdom | 2007 | 16.17 | 0.899 | Total      | Total      | Total      | Total      | Total      |

NA: data not available, HDI: human development index

Partial ban: smoking allowed in smoking zones or ban exemptions for certain categories of venues

Near-total ban: smoking allowed only in enclosed separate rooms.

Total ban: smoking not allowed.

**Table S3. Results of the interrupted time series analysis regarding cigarette consumption for countries with data availability for less than three years before and after each smoking ban law (results representing significant reductions are reported in bold).**

| Country, year of the intervention | Level change             |
|-----------------------------------|--------------------------|
|                                   | RR (95%CI)               |
| Belgium                           |                          |
| 2006                              | 1.06 (0.90, 1.26)        |
| 2007                              | 0.99 (0.84, 1.18)        |
| 2008                              | 0.95 (0.82, 1.08)        |
| 2010                              | 1.01 (0.84, 1.21)        |
| 2011                              | 0.90 (0.80, 1.02)        |
| Croatia                           |                          |
| 2008                              | 1.09 (0.92, 1.30)        |
| 2009                              | <b>0.71 (0.58, 0.86)</b> |
| 2010                              | 0.87 (0.74, 1.01)        |
| Estonia                           |                          |
| 2005                              | 1.30 (0.83, 2.03)        |
| 2007                              | 1.17 (0.71, 1.95)        |
| France                            |                          |
| 1976                              | 1.37 (1.20, 1.55)        |
| 1991                              | 1.45 (1.16, 1.82)        |
| 2007                              | 1.22 (0.86, 1.74)        |
| 2008                              | 1.14 (0.83, 1.58)        |
| Germany                           |                          |
| 2007                              | <b>0.76 (0.64, 0.89)</b> |
| 2008                              | <b>0.75 (0.68, 0.82)</b> |
| Greece                            |                          |
| 2003                              | 1.02 (0.90, 1.15)        |
| 2009                              | 1.00 (0.79, 1.26)        |
| 2010                              | <b>0.60 (0.52, 0.69)</b> |
| Netherlands                       |                          |
| 1990                              | 1.07 (0.92, 1.25)        |
| 2004                              | 1.09 (0.86, 1.38)        |
| 2008                              | 1.04 (0.80, 1.35)        |
| 2014                              | 1.07 (0.75, 1.52)        |

RR: rate ratio, CI: confidence interval

**Table S4. Results of the interrupted time series analysis regarding AMI mortality for countries with data availability for less than three years before and after each smoking ban law (results representing significant reductions are reported in bold).**

| Country, year of the intervention | Level change             |
|-----------------------------------|--------------------------|
|                                   | RR (95%CI)               |
| Belgium                           |                          |
| 2006                              | <b>0.92 (0.90, 0.95)</b> |
| 2007                              | <b>0.95 (0.92, 0.97)</b> |
| 2008                              | <b>0.95 (0.92, 0.97)</b> |
| 2010                              | <b>0.95 (0.92, 0.98)</b> |
| 2011                              | <b>0.94 (0.90, 0.97)</b> |
| Croatia                           |                          |
| 2008                              | 0.91 (0.81, 1.02)        |
| 2009                              | 0.92 (0.85, 1.00)        |
| 2010                              | 0.97 (0.89, 1.06)        |
| Czech Republic                    |                          |
| 2006                              | 0.97 (0.97, 1.09)        |
| 2017                              | 1.00 (0.81, 1.23)        |
| Estonia                           |                          |
| 2005                              | 1.10 (0.90, 1.34)        |
| 2007                              | 0.91 (0.74, 1.12)        |
| France                            |                          |
| 2007                              | 0.97 (0.92, 1.02)        |
| 2008                              | <b>0.93 (0.88, 0.98)</b> |
| Greece                            |                          |
| 2003                              | 1.03 (0.96, 1.11)        |
| 2009                              | 1.00 (0.89, 1.14)        |
| 2010                              | 0.92 (0.81, 1.04)        |
| Romania                           |                          |
| 2008                              | <b>0.86 (0.79, 0.95)</b> |
| 2016                              | <b>0.79 (0.68, 0.92)</b> |

RR: rate ratio, CI: confidence interval

**Figure S1. Trends of per-capita cigarette consumption for all countries included in the analysis.**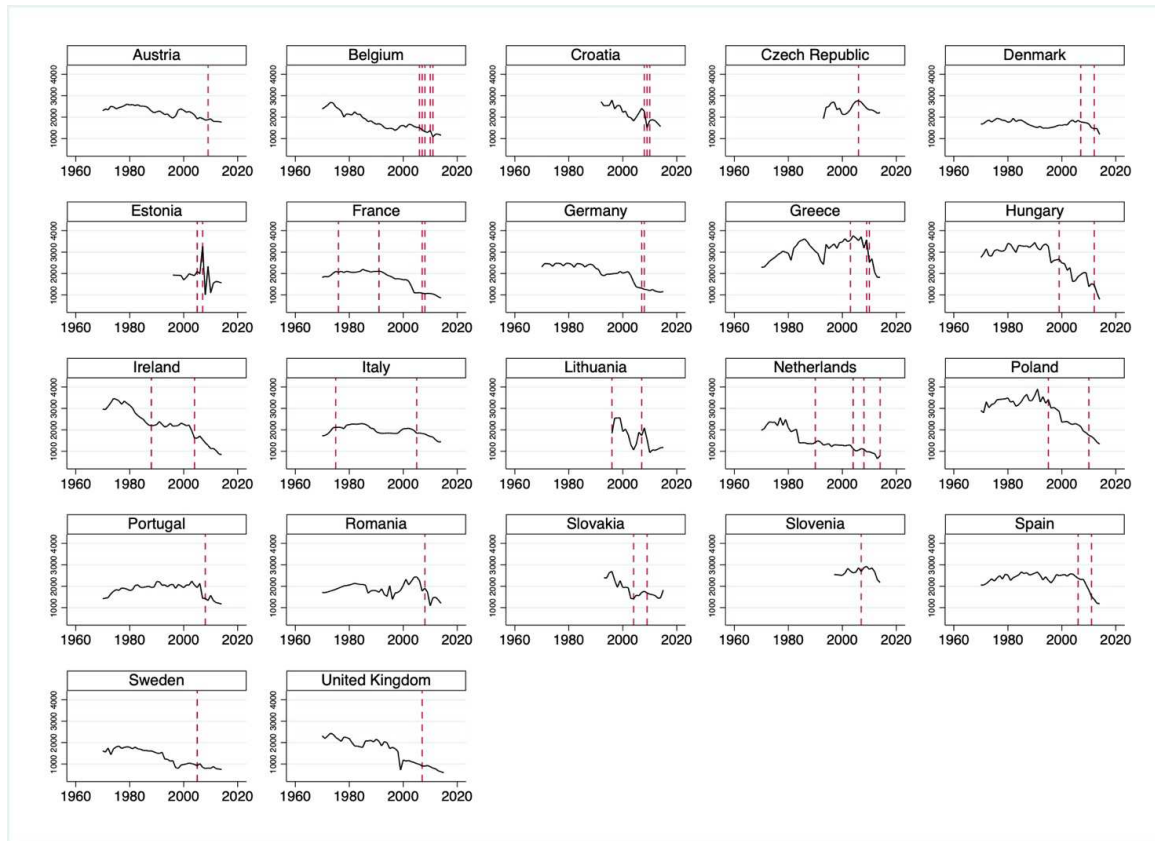

Vertical dashed lines represent smoking bans that entered into force between 1970 and 2015.

Vertical axis displays per-capita cigarette consumption, horizontal axis displays years.

**Figure S2. Trends of mortality due to acute myocardial infarction (AMI) for all countries included in the analysis.**

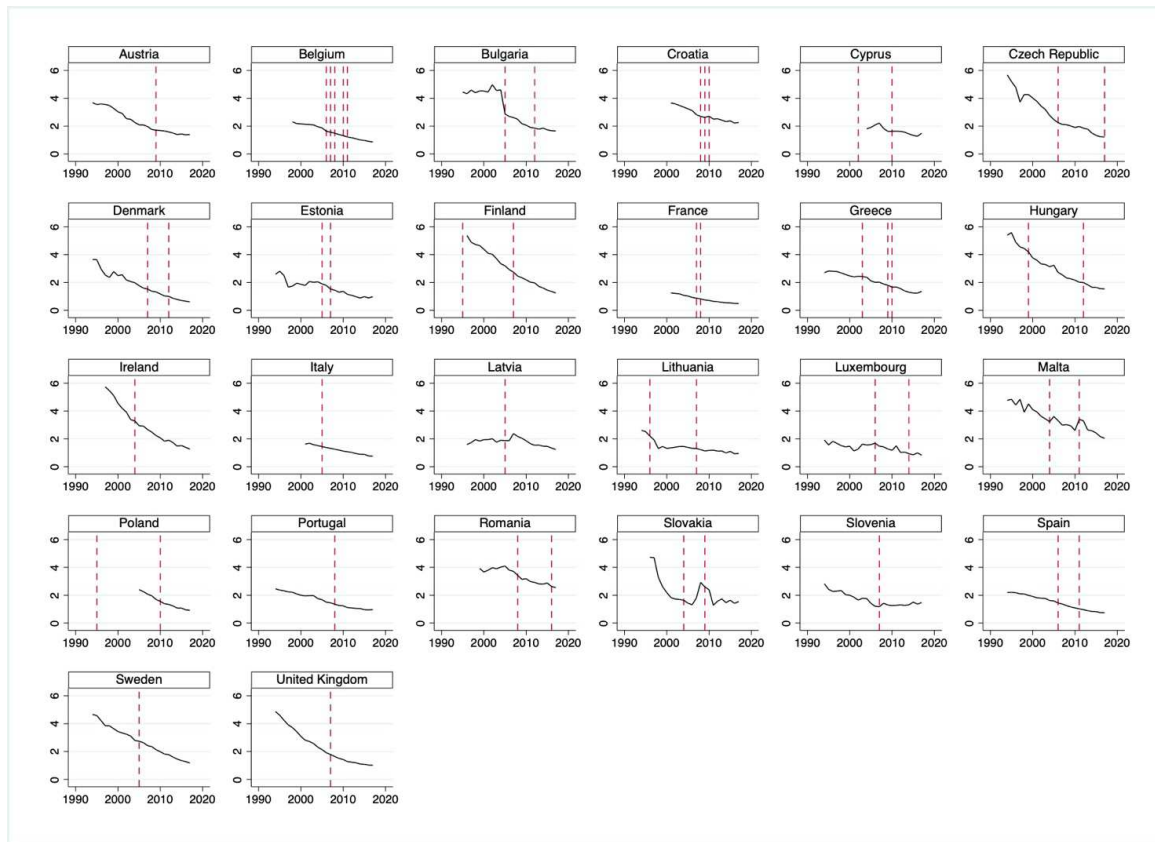

Vertical dashed lines represent smoking bans that entered into force between 1994 and 2017.

Vertical axis displays standardized AMI mortality ratios, horizontal axis displays years.
